# Supplementary material for: Sucrose-delaying flower color fading associated with delaying anthocyanin accumulation decrease in cut chrysanthemum
Source: PeerJ. 2023 Dec 11;11:e16520. doi: 10.7717/peerj.16520 (PMC10720401; doi:10.7717/peerj.16520)
Supplement: Supplemental Information 3 [file peerj-11-16520-s003.xlsx]

## Sheet: fig 1 raw data
Figure 1B the raw data of flower diameters																																average	stde
0d（2021.01.18）
CK	6.5	6.4	6.5	6.4	6.5	6.6	6.6	6.5	6.4	6.6	6.5	6.4	6.5	6.4	6.5	6.6	6.6	6.5	6.4	6.6	6.5	6.4	6.5	6.4	6.5	6.6	6.6	6.5	6.4	6.6		6.5	0.0547723
Suc	6.5	6.4	6.5	6.4	6.5	6.6	6.6	6.5	6.4	6.6	6.5	6.4	6.5	6.4	6.5	6.6	6.6	6.5	6.4	6.6	6.5	6.4	6.5	6.4	6.5	6.6	6.6	6.5	6.4	6.6		6.5	0.0547723
6d
CK	7.6	7.5	7.4	7.8	7.8	7.3	7.3	7.5	7.5	7.6	7.8	7.5	7.4	7.8	7.7	7.4	7.5	7.5	7.4	7.6	7.5	7.5	7.5	7.8	7.8	7.4	7.3	7.5	7.4	7.6		7.54	0.111952
Suc	8.2	8.2	8	8	8.1	8.1	8	8.2	7.8	8.3	8.2	8.2	8	7.9	8.1	8.3	8	8.3	8.1	8.3	8.2	8.2	8	7.8	8.1	8.2	8	8.4	7.9	8.2		8.11	0.105436
12d
CK	7.4	7.6	7.5	7.8	7.6	7.8	7.8	7.5	7.9	7.8	7.4	7.7	7.5	7.6	7.5	7.5	7.5	7.5	7.5	7.8	7.5	7.6	7.5	7.8	7.3	7.4	7.4	7.3	7.9	7.8		7.59	0.17685
Suc	7.8	8.2	7.9	8.3	8.3	8.1	8.1	8.2	8.3	8.2	8.1	8.2	7.8	8.2	8.3	8.1	8.3	8.2	8.3	8.2	8.1	8.2	8	8.3	8.3	8.1	8.3	8.2	8.3	8.2		8.17	0.141787
18d
CK	8.4	8.1	8.1	8.3	8.2	8.2	8	8.2	8	8	8.2	8	8.1	8.1	8.2	8.2	7.9	8.2	8	8.1	8	7.9	8.1	8.3	8.2	8.3	7.6	8.2	8	8		8.10333	0.156433
Suc	8.7	8.5	8.7	8.9	8.6	8.6	8.7	8.5	8.6	8.8	8.8	8.9	8.9	8.8	8.6	8.8	8.7	8.5	8.7	9.2	8.8	8.7	8.7	8.9	8.6	8.4	8.7	8.6	8.8	9		8.72333	0.167504

## Sheet: fig 2 raw data
CK
L*																																averages	stde
0d	32.93	31.26	37.49	34.84	34.32	37.93	34.85	34.71	34.25	32.93	31.26	37.49	34.84	34.32	37.93	34.85	34.71	34.25	32.93	31.26	37.49	34.84	34.32	37.93	34.85	34.71	34.25	34.85	34.71	34.25		34.7183	1.86559
6d	48.52	50.11	48.89	47.76	45.91	48.65	50.12	47.25	48.07	48.52	50.11	48.89	47.76	45.91	48.65	50.12	47.25	48.07	48.52	50.11	48.89	47.76	45.91	48.65	50.12	47.25	48.07	50.12	47.25	48.07		48.376	1.27434
12d	51.27	52.98	54.15	49.63	48.56	48.12	51.96	50.87	52.33	51.27	52.98	54.15	49.63	48.56	48.12	51.96	50.87	52.33	51.27	52.98	54.15	49.63	48.56	48.12	51.96	50.87	52.33	51.96	50.87	52.33		51.159	1.85875
18d	52.58	51.37	50.08	51.33	52.16	53.83	52.96	53.75	52.46	52.58	51.37	50.08	51.33	52.16	53.83	52.96	53.75	52.46	52.58	51.37	50.08	51.33	52.16	53.83	52.96	53.75	52.46	52.96	53.75	52.46		52.3577	1.13979
a*
0d	43.42	44.17	41.42	42.46	43.4	41.92	45.29	40.31	42.8	43.42	44.17	41.42	42.46	43.4	41.92	45.29	40.31	42.8	43.42	44.17	41.42	42.46	43.4	41.92	45.29	40.31	42.8	45.29	40.31	42.8		42.799	1.50686
6d	35.23	34.57	37.76	35.53	36.68	33.44	34.9	31.9	37.13	35.23	34.57	37.76	35.53	36.68	33.44	34.9	31.9	37.13	35.23	34.57	37.76	35.53	36.68	33.44	34.9	31.9	37.13	34.9	31.9	37.13		35.1783	1.81802
12d	33.25	33.45	35.87	31.89	31.42	36.89	34.12	32.03	33.08	33.25	33.45	35.87	31.89	31.42	36.89	34.12	32.03	33.08	33.25	33.45	35.87	31.89	31.42	36.89	34.12	32.03	33.08	34.12	32.03	33.08		33.5077	1.69342
18d	32.05	33.37	33.73	33.09	32.38	31.05	32.72	31.09	30.88	32.05	33.37	33.73	33.09	32.38	31.05	32.72	31.09	30.88	32.05	33.37	33.73	33.09	32.38	31.05	32.72	31.09	30.88	32.72	31.09	30.88		32.1923	1.02748
b*
0d	-5.05	-4.27	-7.16	-5.23	-5.39	-7.68	-5.79	-4.82	-4.45	-5.05	-4.27	-7.16	-5.23	-5.39	-7.68	-5.79	-4.82	-4.45	-5.05	-4.27	-7.16	-5.23	-5.39	-7.68	-5.79	-4.82	-4.45	-5.79	-4.82	-4.45		-5.486	1.09096
6d	-8.73	-10.34	-8.01	-5.53	-8.33	-9.01	-9.16	-8.95	-7.65	-8.73	-10.34	-8.01	-5.53	-8.33	-9.01	-9.16	-8.95	-7.65	-8.73	-10.34	-8.01	-5.53	-8.33	-9.01	-9.16	-8.95	-7.65	-9.16	-8.95	-7.65		-8.42967	1.22699
12d	-9.64	-9.5	-9.08	-8.25	-10.57	-9.27	-8.66	-11.06	-10.47	-9.64	-9.5	-9.08	-8.25	-10.57	-9.27	-8.66	-11.06	-10.47	-9.64	-9.5	-9.08	-8.25	-10.57	-9.27	-8.66	-11.06	-10.47	-8.66	-11.06	-10.47		-9.65633	0.918321
18d	-10.85	-10.17	-10.08	-10.37	-10.13	-10.54	-9.41	-10.71	-9.78	-10.85	-10.17	-10.08	-10.37	-10.13	-10.54	-9.41	-10.71	-9.78	-10.85	-10.17	-10.08	-10.37	-10.13	-10.54	-9.41	-10.71	-9.78	-9.41	-10.71	-9.78		-10.2007	0.45501
C*
0d	43.7127	44.3759	42.0343	42.7809	43.7334	42.6177	45.6586	40.5971	43.0307	43.7127	44.3759	42.0343	42.7809	43.7334	42.6177	45.6586	40.5971	43.0307	43.7127	44.3759	42.0343	42.7809	43.7334	42.6177	45.6586	40.5971	43.0307	45.6586	40.5971	43.0307		43.1637	1.47115
6d	36.2955	36.0832	38.6002	35.9578	37.614	34.6326	36.0821	33.1317	37.9099	36.2955	36.0832	38.6002	35.9578	37.614	34.6326	36.0821	33.1317	37.9099	36.2955	36.0832	38.6002	35.9578	37.614	34.6326	36.0821	33.1317	37.9099	36.0821	33.1317	37.9099		36.2015	1.66406
12d	34.6192	34.7729	37.0014	32.9399	33.1503	38.0369	35.2018	33.8858	34.6974	34.6192	34.7729	37.0014	32.9399	33.1503	38.0369	35.2018	33.8858	34.6974	34.6192	34.7729	37.0014	32.9399	33.1503	38.0369	35.2018	33.8858	34.6974	35.2018	33.8858	34.6974		34.8901	1.53583
18d	33.8367	34.8853	35.204	34.6769	33.9276	32.7902	34.0462	32.883	32.3917	33.8367	34.8853	35.204	34.6769	33.9276	32.7902	34.0462	32.883	32.3917	33.8367	34.8853	35.204	34.6769	33.9276	32.7902	34.0462	32.883	32.3917	34.0462	32.883	32.3917		33.7749	0.953872
S
L*																																averages	stde
0d	32.93	31.26	37.49	34.84	34.32	37.93	34.85	34.71	34.25	32.93	31.26	37.49	34.84	34.32	37.93	34.85	34.71	34.25	32.93	31.26	37.49	34.84	34.32	37.93	34.85	34.71	34.25	34.85	34.71	34.25		34.7183	1.86559
6d	40.54	42.12	38.57	46.19	40.94	38.81	42.88	43.03	39.97	40.54	42.12	38.57	46.19	40.94	38.81	42.88	43.03	39.97	40.54	42.12	38.57	46.19	40.94	38.81	42.88	43.03	39.97	42.88	43.03	39.97		41.501	2.23341
12d	43.12	42.15	46.52	40.18	39.76	45.91	43.86	43.51	42.84	43.12	42.15	46.52	40.18	39.76	45.91	43.86	43.51	42.84	43.12	42.15	46.52	40.18	39.76	45.91	43.86	43.51	42.84	43.86	43.51	42.84		43.1253	2.06586
18d	40.73	44.27	47.91	40.71	42.51	44.08	50.11	43.45	45.77	40.73	44.27	47.91	40.71	42.51	44.08	50.11	43.45	45.77	40.73	44.27	47.91	40.71	42.51	44.08	50.11	43.45	45.77	50.11	43.45	45.77		44.5983	3.04927
a*
0d	43.42	44.17	41.42	42.46	43.4	41.92	45.29	40.31	42.8	43.42	44.17	41.42	42.46	43.4	41.92	45.29	40.31	42.8	43.42	44.17	41.42	42.46	43.4	41.92	45.29	40.31	42.8	45.29	40.31	42.8		42.799	1.50686
6d	41.87	39.05	41.84	38.89	40.89	42.43	40.53	41.67	39.85	41.87	39.05	41.84	38.89	40.89	42.43	40.53	41.67	39.85	41.87	39.05	41.84	38.89	40.89	42.43	40.53	41.67	39.85	40.53	41.67	39.85		40.7703	1.19927
12d	36.85	37.45	39.48	36.81	34.27	37.18	38.06	37.77	36.93	36.85	37.45	39.48	36.81	34.27	37.18	38.06	37.77	36.93	36.85	37.45	39.48	36.81	34.27	37.18	38.06	37.77	36.93	38.06	37.77	36.93		37.2387	1.27126
18d	36.9	35.4	31.86	37.66	34.36	36.28	32.9	34.13	36.2	36.9	35.4	31.86	37.66	34.36	36.28	32.9	34.13	36.2	36.9	35.4	31.86	37.66	34.36	36.28	32.9	34.13	36.2	32.9	34.13	36.2		35.01	1.80692
b*
0d	-5.05	-4.27	-7.16	-5.23	-5.39	-7.68	-5.79	-4.82	-4.45	-5.05	-4.27	-7.16	-5.23	-5.39	-7.68	-5.79	-4.82	-4.45	-5.05	-4.27	-7.16	-5.23	-5.39	-7.68	-5.79	-4.82	-4.45	-5.79	-4.82	-4.45		-5.486	1.09096
6d	-8.79	-6.96	-7.5	-8.45	-8.34	-6.7	-8.02	-6.83	-8.39	-8.79	-6.96	-7.5	-8.45	-8.34	-6.7	-8.02	-6.83	-8.39	-8.79	-6.96	-7.5	-8.45	-8.34	-6.7	-8.02	-6.83	-8.39	-8.02	-6.83	-8.39		-7.77267	0.752618
12d	-9.45	-8.51	-8.97	-9.12	-7.64	-7.47	-8.16	-7.21	-8.42	-9.45	-8.51	-8.97	-9.12	-7.64	-7.47	-8.16	-7.21	-8.42	-9.45	-8.51	-8.97	-9.12	-7.64	-7.47	-8.16	-7.21	-8.42	-8.16	-7.21	-8.42		-8.288	0.736283
18d	-10.32	-9.79	-10.16	-10.38	-7.05	-8.57	-8.33	-7.46	-8.48	-10.32	-9.79	-10.16	-10.38	-7.05	-8.57	-8.33	-7.46	-8.48	-10.32	-9.79	-10.16	-10.38	-7.05	-8.57	-8.33	-7.46	-8.48	-8.33	-7.46	-8.48		-8.863	1.18339
C*
0d	43.7127	44.3759	42.0343	42.7809	43.7334	42.6177	45.6586	40.5971	43.0307	43.7127	44.3759	42.0343	42.7809	43.7334	42.6177	45.6586	40.5971	43.0307	43.7127	44.3759	42.0343	42.7809	43.7334	42.6177	45.6586	40.5971	43.0307	45.6586	40.5971	43.0307		43.1637	1.47115
6d	42.7827	39.6654	42.5069	39.7974	41.7319	42.9557	41.3159	42.226	40.7236	42.7827	39.6654	42.5069	39.7974	41.7319	42.9557	41.3159	42.226	40.7236	42.7827	39.6654	42.5069	39.7974	41.7319	42.9557	41.3159	42.226	40.7236	41.3159	42.226	40.7236		41.5127	1.1438
12d	38.0424	38.4047	40.4862	37.923	35.1113	37.923	38.9249	38.452	37.8777	38.0424	38.4047	40.4862	37.923	35.1113	37.923	38.9249	38.452	37.8777	38.0424	38.4047	40.4862	37.923	35.1113	37.923	38.9249	38.452	37.8777	38.9249	38.452	37.8777		38.1563	1.28218
18d	38.316	36.7288	33.4408	39.0643	35.0758	37.2785	33.9382	34.9358	37.18	38.316	36.7288	33.4408	39.0643	35.0758	37.2785	33.9382	34.9358	37.18	38.316	36.7288	33.4408	39.0643	35.0758	37.2785	33.9382	34.9358	37.18	33.9382	34.9358	37.18		36.1309	1.85285

## Sheet: fig 3 raw data
Figure 3A Soluble sugar content (mg/g)					averages	stde
0d	15.7692	16.4904	17.9327		16.7308	1.10158
6d-CK	23.9423	16.9712	14.8077		18.5737	4.77352
6d-Suc	48.4615	34.2788	35.9615		39.5673	7.74844
12d-CK	18.8942	20.8173	10.4808		16.7308	5.4974
12d-Suc	49.1827	64.3269	54.4712		55.9936	7.68605
18d-CK	12.4038	10.7212	12.1635		11.7628	0.910081
18d-Suc	42.4519	72.0192	59.7596		58.0769	14.8553
Figure 3B Total antioxidant capacity					averages	stde
0d-CK	9.91119	9.4105	10.4634		9.92837	0.526672
0d-Suc	9.91119	9.4105	10.4634		9.92837	0.526672
6d-CK	11.8049	12.5044	9.75404		11.3545	1.42945
6d-Suc	17.5844	15.9858	18.7151		17.4284	1.37131
12d-CK	12.4125	15.5014	12.7886		13.5675	1.68531
12d-Suc	21.3144	21.5986	17.4143		20.1091	2.33807
18d-CK	11.8049	14.2757	12.2558		12.7788	1.31581
18d-Suc	15.1637	17.0515	16.6709		16.2954	0.99838
Figure 3C Malondialdehyde content (nmol/mL)					averages	stde
0d-CK	0.201389	0.217105	0.184812		0.201102	0.0161486
0d-Suc	0.201389	0.217105	0.184812		0.201102	0.0161486
6d-CK	0.191481	0.146667	0.18417		0.174106	0.0240429
6d-Suc	0.104167	0.138365	0.11194		0.118157	0.0179267
12d-CK	0.16886	0.149912	0.146499		0.15509	0.0120461
12d-Suc	0.126168	0.095122	0.109034		0.110108	0.015551
18d-CK	0.198074	0.22578	0.225962		0.216605	0.0160489
18d-Suc	0.16087	0.196262	0.175926		0.177686	0.0177616
Figure 3D Anthocyanin contents(mg/gFW)					averages	stde
0d	0.885	0.854	0.737		0.825333	0.0780534
6d-CK	0.55	0.438	0.397		0.461667	0.0791981
6d-Suc	0.651	0.629	0.603		0.627667	0.0240278
12d-CK	0.382	0.4	0.467		0.416333	0.0447921
12d-Suc	0.569	0.582	0.537		0.562667	0.0231589
18d-CK	0.348	0.341	0.32		0.336333	0.0145717
18d-Suc	0.498	0.463	0.5		0.487	0.0208087

## Sheet: fig 4 raw data
CHS
	actin-ct	CHS-ct		relative expression	average	stde
0d-1	20.67	20.6	-0.07	1.04972	1.27473	0.14812
0d-2	21.18	20.79	-0.39	1.31039
0d-3	20.94	20.39	-0.55	1.46409
6d-CK1	20.63	24.08	3.45	0.0915054	0.0856751	0.00362174
6d-CK2	20.69	24.3	3.61	0.0818996
6d-CK3	20.29	23.87	3.58	0.0836205
6d-Suc1	20.28	23.25	2.97	0.127627	0.140563	0.0111959
6d-Suc2	20.42	23.3	2.88	0.135842
6d-Suc3	21.19	23.85	2.66	0.15822
12d-CK1	21.02	26.09	5.07	0.0297699	0.0276904	0.00133238
12d-CK2	20.82	26.08	5.26	0.0260965
12d-CK3	20.64	25.84	5.2	0.0272047
12d-Suc1	20.67	24.02	3.35	0.098073	0.131709	0.00319465
12d-Suc2	21.11	24	2.89	0.134904
12d-Suc3	21.74	24.7	2.96	0.128514
18d-CK1	21.21	26.76	5.55	0.0213444	0.0207336	0.0022176
18d-CK2	21.15	26.56	5.41	0.0235195
18d-CK3	21.02	26.87	5.85	0.017337
18d-Suc1	21.19	25.14	3.95	0.0647041	0.0668791	0.00994175
18d-Suc2	21.34	24.95	3.61	0.0818996
18d-Suc3	20.59	24.8	4.21	0.0540336
	actin-ct	CHI-ct		relative expression	average	stde
0d-1	20.67	24.11	3.44	0.0921418	0.103044	0.00709183
0d-2	21.18	24.43	3.25	0.105112
0d-3	20.94	24.1	3.16	0.111878
6d-CK1	20.63	26.87	6.24	0.0132304	0.0119807	0.000996804
6d-CK2	20.69	27.04	6.35	0.0122591
6d-CK3	20.29	26.87	6.58	0.0104526
6d-Suc1	20.28	25.95	5.67	0.0196408	0.021026	0.00086316
6d-Suc2	20.42	25.96	5.54	0.0214928
6d-Suc3	21.19	26.7	5.51	0.0219445
12d-CK1	21.02	28.28	7.26	0.00652412	0.00621942	0.000200852
12d-CK2	20.82	28.16	7.34	0.0061722
12d-CK3	20.64	28.03	7.39	0.00596195
12d-Suc1	20.67	26.19	5.52	0.0217929	0.023633	0.00122748
12d-Suc2	21.11	26.59	5.48	0.0224056
12d-Suc3	21.74	27.07	5.33	0.0248605
18d-CK1	21.21	28.49	7.28	0.0064343	0.00606468	0.000226347
18d-CK2	21.15	28.56	7.41	0.00587987
18d-CK3	21.02	28.43	7.41	0.00587987
18d-Suc1	21.19	27.24	6.05	0.0150928	0.0168848	0.00123479
18d-Suc2	21.34	27.09	5.75	0.0185814
18d-Suc3	20.59	26.47	5.88	0.0169802
	actin-ct	F3H-ct		relative expression	average	stde
0d-1	20.44	21.18	0.74	0.598739	0.665399	0.051126
0d-2	20.88	21.31	0.43	0.742262
0d-3	20.88	21.49	0.61	0.655197
6d-CK1	21.04	24.06	3.02	0.123279	0.0847954	0.0238058
6d-CK2	21.03	24.86	3.83	0.0703162
6d-CK3	19.51	23.55	4.04	0.0607909
6d-Suc1	20.77	23.79	3.02	0.123279	0.147073	0.0204409
6d-Suc2	20.74	23.22	2.48	0.179244
6d-Suc3	21.19	24.04	2.85	0.138696
12d-CK1	21.32	28.03	6.71	0.00955188	0.00960044	0.00100723
12d-CK2	21.19	27.69	6.5	0.0110485
12d-CK3	20.96	27.89	6.93	0.00820091
12d-Suc1	20.93	25.12	4.19	0.0547879	0.0542855	0.00821454
12d-Suc2	21.23	25.23	4	0.0625
12d-Suc3	21.74	26.18	4.44	0.0460709
18d-CK1	21.51	28.19	6.68	0.00975258	0.0101605	0.000799284
18d-CK2	21.33	28.08	6.75	0.00929068
18d-CK3	21.32	27.77	6.45	0.0114382
18d-Suc1	21.79	26.49	4.7	0.0384733	0.0338072	0.00289459
18d-Suc2	21.68	26.7	5.02	0.0308198
18d-Suc3	21.11	26.07	4.96	0.0321286
	actin-ct	F3'H-ct		relative expression	average	stde
0d-1	20.5986	27.9618	7.36311	0.00607411	0.00584401	0.000335004
0d-2	20.9591	28.3022	7.34314	0.00615878
0d-3	20.6044	28.1644	7.56003	0.00529913
6d-CK1	20.8987	32.3176	11.4189	0.000365236	0.000209179	9.76574e-05
6d-CK2	20.9018	34.151	13.2491	0.000102712
6d-CK3	20.472	33.0853	12.6133	0.00015959
6d-Suc1	20.587	30.3174	9.73037	0.00117725	0.00134419	0.000447955
6d-Suc2	21.1303	30.0644	8.93408	0.00204444
6d-Suc3	20.6012	30.8695	10.2682	0.000810869
12d-CK1	21.2115	33.6493	12.4378	0.000180243	0.000113634	4.48286e-05
12d-CK2	21.1061	35.2819	14.1759	5.40309e-05
12d-CK3	20.6353	33.8304	13.1951	0.000106627
12d-Suc1	20.8065	31.2201	10.4136	0.000733138	0.000883932	0.00011312
12d-Suc2	21.1004	31.0704	9.97004	0.000997052
12d-Suc3	21.3962	31.7375	10.3413	0.000770812
18d-CK1	21.3307	33.7742	12.4435	0.000179524	0.000215582	3.24167e-05
18d-CK2	21.2402	33.5276	12.2874	0.000200047
18d-CK3	21.2205	33.0905	11.8699	0.000267175
18d-Suc1	21.4557	31.1329	9.67722	0.00122142	0.00127085	0.000434656
18d-Suc2	20.9187	31.4359	10.5172	0.000682359
18d-Suc3	21.5684	30.6015	9.03314	0.00190877
	actin-ct	DFR-ct		relative expression	average	stde
0d-1	20.45	22.1	1.65	0.31864	0.317364	0.0209106
0d-2	20.29	22.09	1.8	0.287175
0d-3	20.08	21.61	1.53	0.346277
6d-CK1	20.64	25.42	4.78	0.0363979	0.0350093	0.0021858
6d-CK2	20.65	25.4	4.75	0.0371627
6d-CK3	20.29	25.28	4.99	0.0314674
6d-Suc1	20.57	24.68	4.11	0.0579118	0.0715026	0.0131974
6d-Suc2	20.6	24.03	3.43	0.0927827
6d-Suc3	21.06	25.03	3.97	0.0638133
12d-CK1	20.89	29.68	8.79	0.00225916	0.00173658	0.000320521
12d-CK2	20.53	29.91	9.38	0.00150085
12d-CK3	20.39	29.82	9.43	0.00144973
12d-Suc1	20.59	26.17	5.58	0.0209051	0.0154359	0.00415381
12d-Suc2	20.22	26.17	5.95	0.016176
12d-Suc3	21.1	27.86	6.76	0.00922651
18d-CK1	21.11	30.15	9.04	0.00189972	0.00184812	0.000154408
18d-CK2	21.17	30.11	8.94	0.00203607
18d-CK3	21.13	30.41	9.28	0.00160858
18d-Suc1	21.38	27.76	6.38	0.0120068	0.0119796	8.95398e-05
18d-Suc2	21.49	27.89	6.4	0.0118415
18d-Suc3	21.11	27.48	6.37	0.0120904
	actin-ct	ANS-ct		relative expression	average	stde
0d-1	20.45	27.11	6.66	0.00988872	0.00880631	0.000705953
0d-2	20.29	27.27	6.98	0.00792156
0d-3	20.08	26.94	6.86	0.00860863
6d-CK1	20.64	30.98	10.34	0.000771525	0.000802518	6.8547e-05
6d-CK2	20.65	31.08	10.43	0.000724865
6d-CK3	20.29	30.39	10.1	0.000911165
6d-Suc1	20.57	30.1	9.53	0.00135265	0.0018463	0.000388465
6d-Suc2	20.6	29.28	8.68	0.00243815
6d-Suc3	21.06	30.22	9.16	0.0017481
12d-CK1	20.89	37.12	16.23	1.30102e-05	1.56783e-05	1.7493e-06
12d-CK2	20.53	36.45	15.92	1.61288e-05
12d-CK3	20.39	36.16	15.77	1.7896e-05
12d-Suc1	20.59	32.23	11.64	0.000313336	0.000272194	4.77717e-05
12d-Suc2	20.22	31.88	11.66	0.000309023
12d-Suc3	21.1	33.43	12.33	0.000194223
18d-CK1	21.11	N/A	#VALUE!	0	1.9515e-06	1.71356e-06
18d-CK2	21.17	40.85	19.68	1.1905e-06
18d-CK3	21.13	38.84	17.71	4.664e-06
18d-Suc1	21.38	36.65	15.27	2.53088e-05	1.1529e-05	8.54088e-06
18d-Suc2	21.49	38.72	17.23	6.50509e-06
18d-Suc3	21.11	39.57	18.46	2.77323e-06
	actin-ct	UFGT-ct		relative expression	average	stde
0d-1	20.5986	21.6206	1.02198	0.492438	0.457691	0.0365346
0d-2	20.9591	22.2871	1.32801	0.398317
0d-3	20.6044	21.6563	1.05195	0.482317
6d-CK1	20.8987	25.2541	4.35545	0.0488515	0.0426317	0.00399887
6d-CK2	20.9018	25.6273	4.7255	0.0377992
6d-CK3	20.472	25.0717	4.59966	0.0412444
6d-Suc1	20.81	24.5305	3.72046	0.075863	0.0855088	0.00868161
6d-Suc2	20.9	24.2316	3.33163	0.0993294
6d-Suc3	21.3	24.92	3.62	0.0813339
12d-CK1	21.2115	29.0148	7.80331	0.00447682	0.00502479	0.00110203
12d-CK2	21.1061	28.3099	7.2038	0.00678328
12d-CK3	20.6353	28.6697	8.03437	0.00381428
12d-Suc1	20.8065	25.6888	4.88234	0.0339054	0.0306885	0.00930132
12d-Suc2	21.1004	25.7446	4.64422	0.0399898
12d-Suc3	21.3962	26.9433	5.54711	0.0213872
18d-CK1	21.3307	29.3496	8.01892	0.00385535	0.0039657	0.000151234
18d-CK2	21.2402	29.1314	7.89121	0.00421221
18d-CK3	21.2205	29.2492	8.02862	0.00382952
18d-Suc1	21.4557	27.0242	5.56846	0.021073	0.0255601	0.0083927
18d-Suc2	21.12	27.0336	5.91365	0.0165888
18d-Suc3	21.5	26.1797	4.6797	0.0390186

## Sheet: fig 5 raw data
	actin-ct	MYB6-ct		relative expression	average	stde
0d-1	20.1	23.27	3.17	0.111105	0.109602	0.0067156
0d-2	20.22	23.55	3.33	0.0994421
0d-3	20.15	23.23	3.08	0.118257
6d-CK1	21.78	26.17	4.39	0.0476956	0.0520566	0.00282794
6d-CK2	21.82	25.99	4.17	0.0555527
6d-CK3	20.58	24.82	4.24	0.0529216
6d-Suc1	19.39	23.59	4.2	0.0544094	0.0529042	0.00417607
6d-Suc2	21.19	25.62	4.43	0.0463914
6d-Suc3	19.68	23.79	4.11	0.0579118
12d-CK1	20.74	27.05	6.31	0.0126038	0.0138924	0.00121492
12d-CK2	20.79	27.03	6.24	0.0132304
12d-CK3	20.35	26.33	5.98	0.0158431
12d-Suc1	20.28	25.23	4.95	0.032352	0.0304369	0.00221009
12d-Suc2	19.77	24.73	4.96	0.0321286
12d-Suc3	19.92	25.14	5.22	0.0268302
18d-CK1	20.28	27.83	7.55	0.00533609	0.0045528	0.00060288
18d-CK2	20.63	28.37	7.74	0.00467765
18d-CK3	20.11	28.21	8.1	0.00364466
18d-Suc1	20.71	26.96	6.25	0.013139	0.0118182	0.00100733
18d-Suc2	21.01	27.39	6.38	0.0120068
18d-Suc3	20.48	27.08	6.6	0.0103087
	actin-ct	MYB#7-ct		relative expression	average	stde
0d-1	20.79	24.82	4.03	0.0612138	0.0733534	0.0120209
0d-2	21	24.92	3.92	0.0660636
0d-3	20.52	23.95	3.43	0.0927827
6d-CK1	21.01	25.07	4.06	0.059954	0.0657454	0.00364484
6d-CK2	20.94	24.78	3.84	0.0698304
6d-CK3	20.62	24.51	3.89	0.0674518
6d-Suc1	20.48	25	4.52	0.0435857	0.0501366	0.00569492
6d-Suc2	20.62	25.01	4.39	0.0476956
6d-Suc3	21.3	25.38	4.08	0.0591286
12d-CK1	21.11	25.49	4.38	0.0480273	0.0438205	0.00384442
12d-CK2	21.16	25.61	4.45	0.0457527
12d-CK3	20.9	25.63	4.73	0.0376815
12d-Suc1	20.85	25.74	4.89	0.0337259	0.0294468	0.00266195
12d-Suc2	20.79	26.02	5.23	0.0266448
12d-Suc3	21.27	26.43	5.16	0.0279695
18d-CK1	20.87	25.78	4.91	0.0332616	0.0392603	0.00374427
18d-CK2	21.09	25.62	4.53	0.0432847
18d-CK3	21.25	25.85	4.6	0.0412346
18d-Suc1	21.46	26.65	5.19	0.0273939	0.0265589	0.00247385
18d-Suc2	21.49	26.57	5.08	0.0295643
18d-Suc3	20.87	26.33	5.46	0.0227183
